# Supplementary material for: Ursolic acid inhibits the development of nonalcoholic fatty liver disease by attenuating endoplasmic reticulum stress
Source: Royal Society of Chemistry journal article supplement (doi:10.1039/c5fo00083a), 2015-01-01
Supplement: c5fo00083a1.pdf [file c5fo00083a1.pdf]

## Supplementary Data

*for*

### **Ursolic acid inhibits the development of nonalcoholic fatty liver disease by attenuating endoplasmic reticulum stress**

Jian-Shuang Li<sup>1</sup>, Wen-Jun Wang<sup>1</sup>, Yu Sun<sup>1</sup>, Yu-Hao Zhang<sup>1</sup>, Ling Zheng<sup>1,2\*</sup>

<sup>1</sup>College of Life Sciences, Wuhan University, Wuhan, Hubei, P. R. China, 430072

<sup>2</sup>Diabetes Center, Wuhan University, Wuhan, Hubei, P. R. China, 430072

Corresponding author

Ling Zheng, Ph.D.

College of Life Sciences

Wuhan University

Wuhan, China 430072

Tel: 86-27-68755559

e-mail: [lzheng217@hotmail.com](mailto:lzheng217@hotmail.com)

**Table S1. Sequences of primers used in the present study**

| <b>Primers</b>         | <b>Sequences (5'- 3')</b>                     |
|------------------------|-----------------------------------------------|
| <i>RNA18S5</i> (Human) | TTAAGAGGGACGGCCGGGGG<br>GCCGGG TGAGGTTTCCCGTG |
| <i>IRE1a</i> (Human)   | TCTGCAGGCTGCGTCTTTTA<br>TTCTCATGGCTCGGAGGAGA  |
| <i>ATF6</i> (Human)    | AGTGTGAGCCCTGCAAATCA<br>AGCTCACTCCCTGAGTTCCT  |
| <i>CHOP</i> (Human)    | TTGCCTTTTCTCCTTCGGGAC<br>CAGTCAGCCAAGCCAGAGAA |
| <i>Actb</i> (Mouse)    | GCTCTTTTCCAGCCTTCCTT<br>CGGATGTCAACGTCACACTT  |
| <i>Ppara</i> (Mouse)   | TGACGTTTGTGGCTGGTCAA<br>CAGTGGGGAGAGAGGACAGA  |
| <i>Cpt1a</i> (Mouse)   | GTCCTGCAACTTTGTGCTGG<br>CAGGTGCTGGTGCTTTTCAC  |
| <i>Cpt2</i> (Mouse)    | CCGAGGCATTTGTCAGGGAG<br>AAGTGTCGGTCAAAGCCCTG  |
| <i>Acadl</i> (Mouse)   | GTCCGATTGCCAGCTAATGC<br>AGGCAGAAATCGCCA ACTCA |
| <i>Acadm</i> (Mouse)   | GAAGCCACGAAGTATGCCCT<br>CCTTCATCGCCATTTCTGCG  |
| <i>Acaa1a</i> (Mouse)  | TGCTGGAGAGTGAGAAAGCC<br>TCTGCCGTGAAATGCCAAC   |

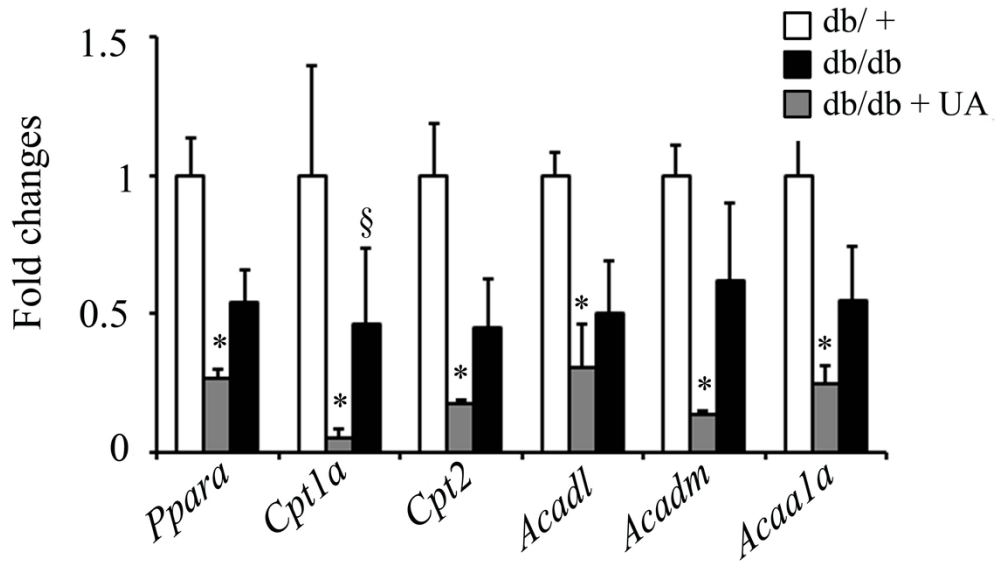

Figure S1

**Figure S1. UA treatment normalized *Cpt1a* level in the livers of db/db mice.** qPCR analysis of *Ppara*, *Cpt1a*, *Cpt2*, *Acadl*, *Acadm* and *Acaala* in the livers of db/db mice (n=2-4 in each group). \*  $p < 0.05$  compared to db/+ mice; §  $p < 0.05$  compared to db/db mice. Error bars represent SEM (standard error of the mean).

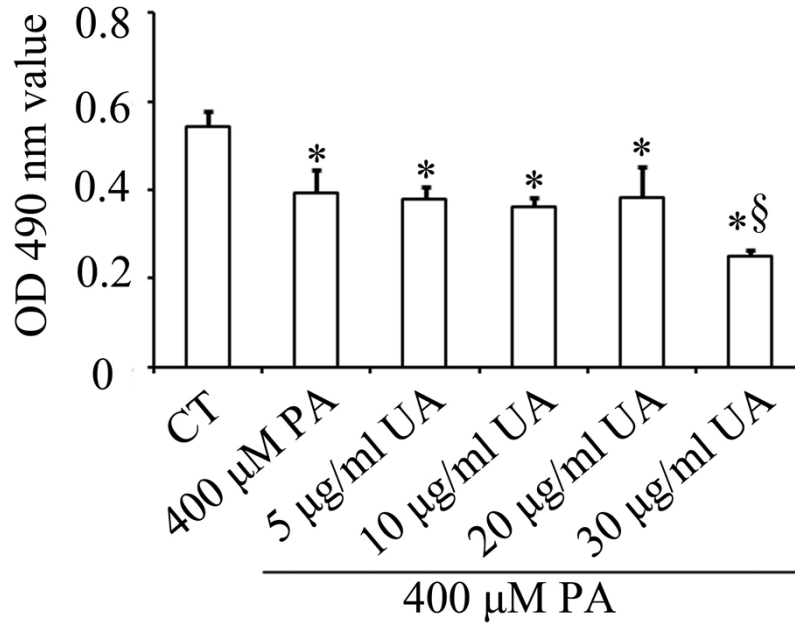

Figure S2

**Figure S2. Effect of UA on the live cell number in cultured hepatocytes.** MTT results of L02 cells cultured under PA treatment with or without of different concentrations of UA. \*  $p < 0.05$  compared to the control treatment; §  $p < 0.05$  compared to 400  $\mu$ M palmitic acid (PA) treatment.
